# Supplementary material
Source: PubMed Central journal article supplement (PMC4405376)
Supplement: NIHMS668502-supplement-1.pdf [file NIHMS668502-supplement-1.pdf]

Supplemental Table I qPCR primer sequences:

| Gene                 | 5' primer                 | 3' primer               |
|----------------------|---------------------------|-------------------------|
| <i>Gata2</i>         | GAATGGACAGAACCGGCC        | AGGTGGTGGTTGTCGTCTGA    |
| <i>Fcer1a</i>        | CCTTTCCTGCTATGGGAACA      | GTCTGAAGGAGCAGCCAATC    |
| <i>Kit</i>           | CATCCATCCAGCACAATCAG      | AACACTCCAGAATCGTCAACT   |
| <i>Il4</i>           | CCTCACACTCCACACCAATG      | AGCCTGGGTTTCCTTGTAGGT   |
| <i>Il13</i>          | ACAGCTCCCTGGTTCTCTCA      | CGTGGCGAAACAGTTGCTTTGTG |
| <i>Hdc</i>           | AAATGTGCAGCCTGGATAACC     | GAGCAGGATAGTAGGCGTGC    |
| <i>Mcpt8</i>         | CTGAAGAGGATGTTCCCTG       | GTGGGGTTTGGACTCTGT      |
| <i>Il6</i>           | ACCACGGCCTTCCCTACTTC      | TGCCATTGCACAACCTTTTTTC  |
| <i>Cd63</i>          | CTCTACGTTCTCCTGCTGGC      | AATGATGACCACAGGCAACA    |
| <i>Itgam</i>         | AAGGATTCAGCAAGCCAGAA      | TAGCAGGAAAGATGGGATGG    |
| <i>Ccl3</i>          | CCTCTGTCACCTGCTCAACA      | GATGAATTGGCGTGGAATCT    |
| <i>Alox5</i>         | CACGGGGACTACATCGAGTT      | GTGCTGCTTGAGGATGTGAA    |
| <i>Itga2</i>         | CCGGGTGCTACAAAAGTCAT      | GTCGGCCACATTGAAAAAGT    |
| <i>Il3ra</i>         | TACCCTCGGAAGCTCAGCAG      | AGAGCAGCGACTTCCTCCAC    |
| <i>Ly6g</i>          | TTGCAAAGTCTGTGTGCTC       | AGGGGCAGGTAGTTGTGTTG    |
| <i>Tslp</i>          | CTGACTGGAGATTTGAAAGGG     | GTGCCATTTCCCTGAGTACCG   |
| <i>Mcpt5</i>         | TGAGAACTACCTGTCGGCCT      | AAGCTTCTGCCACGTGTCTT    |
| <i>Mcpt6</i>         | GGCAGGTGAGCCTGAGATTT      | TAGATACTGCTCACGAAGCTG   |
| <i>Tph1</i>          | CATCAGCCGAGAACAGTTGA      | TTCGGATCCATAACACAGCA    |
| <i>Il4ra</i>         | CCTCACACTCCACACCAATG      | AGCCTGGGTTTCCTTGTAGGT   |
| <i>Mcpt2</i>         | GCACTTCTTTTGCCTTCTGG      | TGAGCTCCAAGGATGACACT    |
| <i>Mcpt1</i>         | GGAGCTCATGATGTGAGCAA      | GACCAGGCAAGGGAATTACA    |
| <i>Cd96</i>          | CAGTCTACAACCTCATTGTGG     | GAAGAGAACTTCTTCCACTCC   |
| <i>Cd103</i>         | ATCAAGACCCCAGCAACAAC      | CTGCCCTTTGGCATAACAGAT   |
| <i>Tpsg1</i>         | CTGACTCTGCTGTGGGAAGA      | ACACACGTGCACCTTGTGCA    |
| <i>Hprt</i>          | CTCATGGACTGATTATGGACAGGAC | GCAGGTGAGCAAACTTATAGCC  |
| <i>Stat5b1&amp;2</i> | TGCAGGGACTGACCTACTCC      | GAAGCCTCGTGGCAGTCTAC    |
| <i>Stat5b3</i>       | ACACAGACAGGCACAAATGG      | CCCCAACGAAAGCAGATTTA    |
| <i>Stat5b4&amp;5</i> | CTGCTGGGGTTTAAAGCTGTC     | ACACTGGAGGGACCTGAATG    |
| <i>Cebpa</i>         | TGGACAAGAACAGCAACGAG      | TCACTGGTCAACTCCAGCAC    |
| <i>Mitf</i>          | AACCGACAGAAGAAGCTGGA      | TGATGATCCGATTCACCAGA    |
| <i>Ela2</i>          | GGCTTTGACCCATCACAAC       | CGGCACATGTTAGTCACCAC    |
| <i>Prtn3</i>         | CAGCTTGTGACAGTGGTGCT      | GGACAGAGTCTGGTCCTGC     |
| <i>Lactiferrin</i>   | GAGAAGATGCTGGCTTCACC      | CACCAATACACAGGGCACAG    |
| <i>Mmp12</i>         | TGATGCAGCTGTCTTTGACC      | TGGGAAGTGTGTGGAATCA     |
| <i>Mpg-1</i>         | AAGGTGCCTCTTGAGCGTTA      | TTCTGATGTGCCTTGCTTTG    |
| <i>Msr1</i>          | CTGGACAAACTGGTCCACCT      | TCCCCTTCTCTCCCTTTTGT    |

Supplemental FIGURE 1

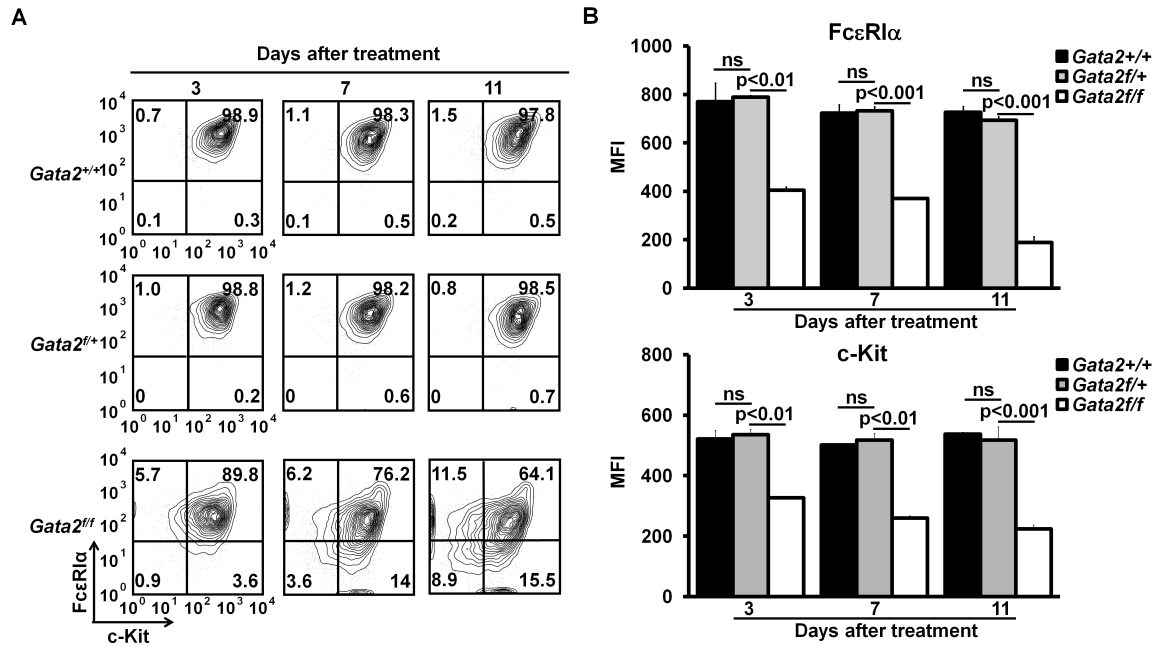

**Supplemental FIGURE 1.** *Gata2* haploinsufficiency is not observed in maintaining FcεRIα expression on basophils and FcεRIα and c-Kit expression on mast cells. **(A)** FACS analysis of 4-week BMDCs treated with 4HT (gated on YFP<sup>+</sup> cells). **(B)** MFIs of FcεRIα and c-Kit expression on YFP<sup>+</sup> *Gata2*<sup>+/+</sup> mast cells, *Gata2*<sup>+/-</sup> mast cells or “*Gata2*<sup>-/-</sup> mast cells” (mean ± SD, n=2).

Supplemental FIGURE 2

A

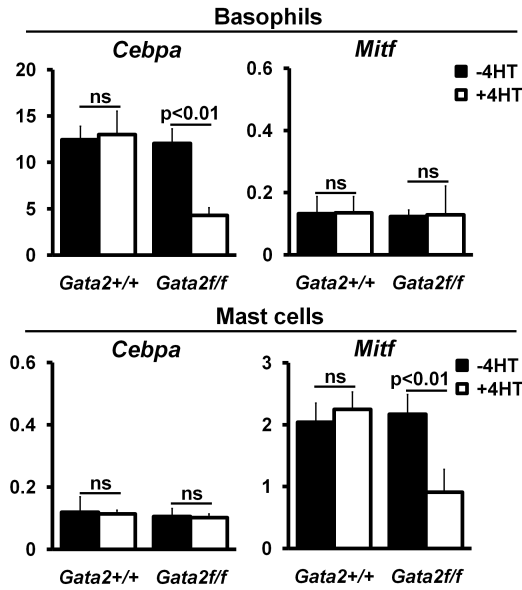

B

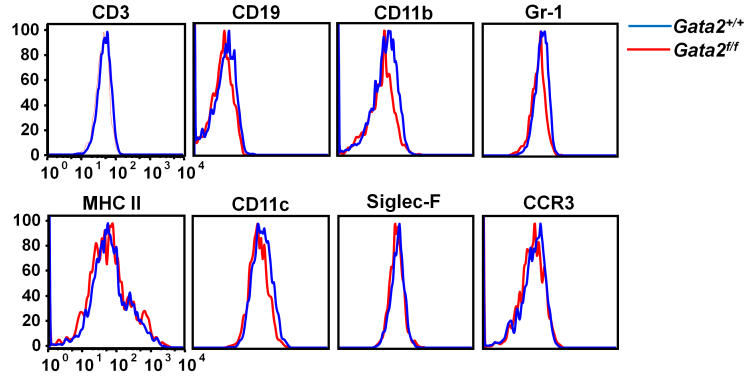

C

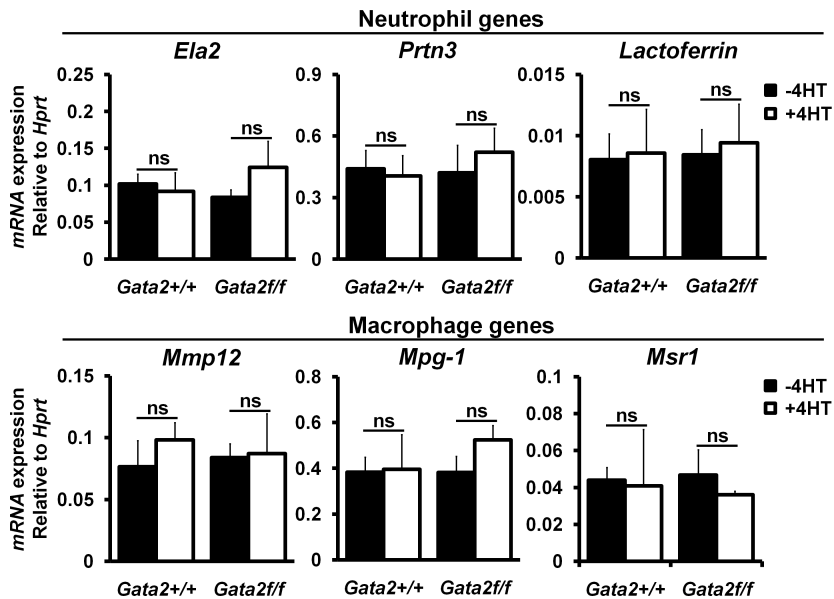

**Supplemental FIGURE 2.** Analysis of re-expression of lineage-specific genes or cell surface markers. **(A)** qPCR analysis of *Cebpa* and *Mitf* mRNA expression in the FACS-sorted YFP<sup>+</sup> *Gata2*<sup>+/+</sup> or *Gata2*<sup>-/-</sup> basophils at day 5 after the initial 4HT treatment or in the FACS-sorted YFP<sup>+</sup>*Gata2*<sup>+/+</sup> mast cells or “*Gata2*<sup>-/-</sup> mast cells” at day 11 after the initial 4HT treatment (mean ± SD, triplicates). **(B)** Expression of T cell, B cell, neutrophil and macrophage, dendritic cell, or eosinophil surface markers on YFP<sup>+</sup>*Gata2*<sup>+/+</sup> mast cells or “*Gata2*<sup>-/-</sup> mast cells” at day 11 after the initial 4HT treatment. **(C)** qPCR analysis of mRNA expression of neutrophil- and macrophage-specific genes in the FACS-sorted YFP<sup>+</sup> *Gata2*<sup>+/+</sup> mast cells or “*Gata2*<sup>-/-</sup> mast cells” at day 11 after the initial 4HT treatment (mean ± SD, triplicates). Data represent two independent experiments with similar results.
